# Supplementary material
Source: MDPI journal article supplement (https://www.mdpi.com/2072-4292/13/21/4474)
Supplement: s1 [file s1]

### **List of Supplementary Figures**

**Figure. S1.** Spatio-temporal variability of Sen's slope derived from different datasets: (a) based on original CHIRPS and (b) based on Kriging corrected CHIRPS.

**Figure. S2.** Validation of significant (a and c) decreasing trends and (b and d) increasing trends.

### **List of Supplementary Tables**

**Table S1.** Standardised Rainfall Anomaly (SRA) from 2001 to 2018.

**Table S2.** Standardised NDVI Anomaly (SNA) during dry, normal and wet years.

**Table S3.** Area statistics (in %) of Sen's slope derived from different approaches using the Annual Mean NDVI.

**Table S4.** Area statistics (in %) of Sen's slope derived from different approaches using Mean NDVI from the peak-growth period.

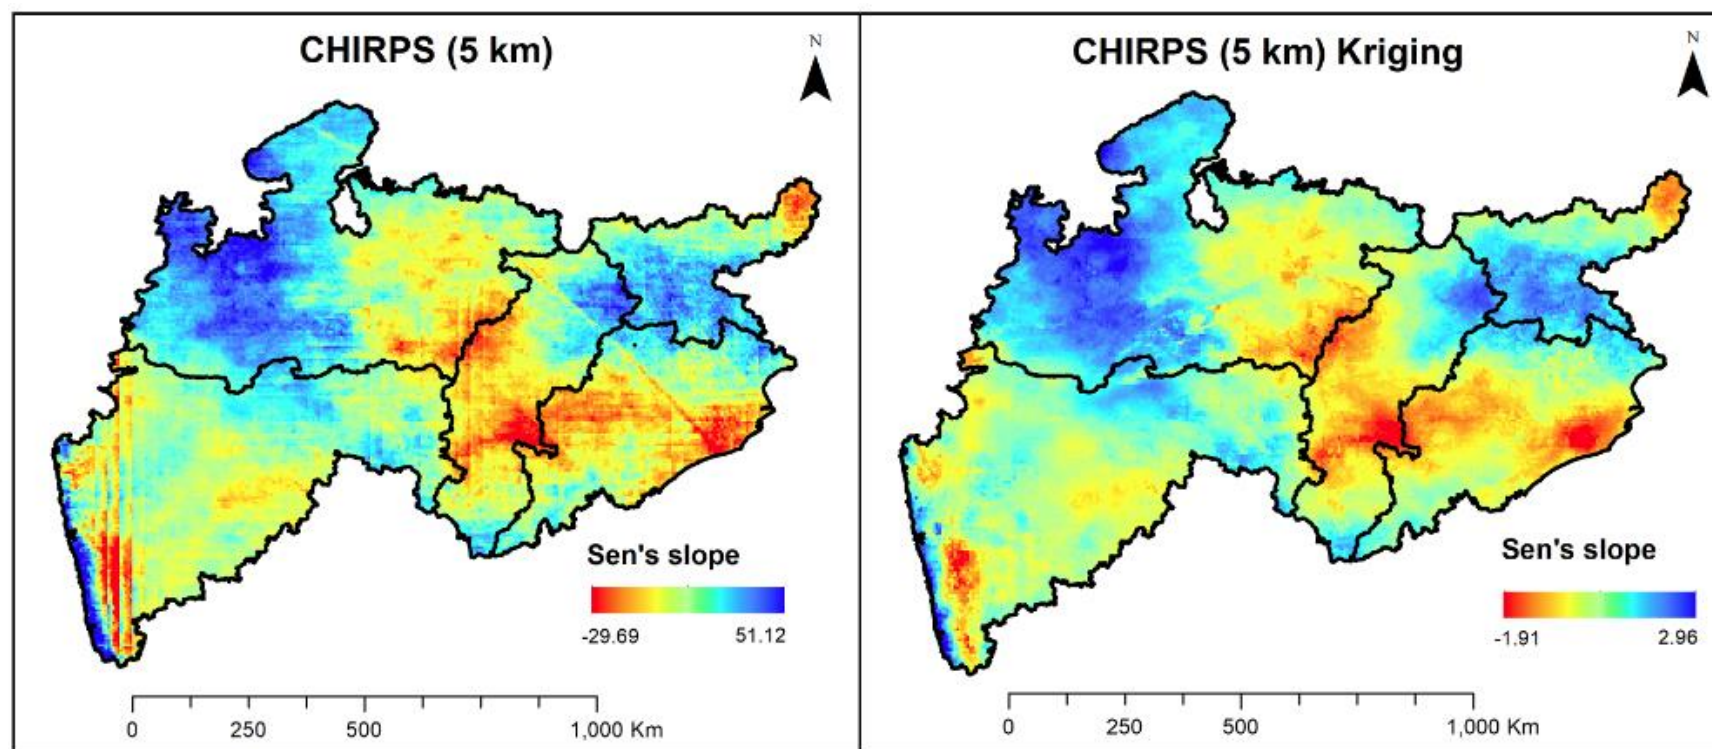

**Figure S1.** Spatio-temporal variability derived Sen's slope from different datasets: (a) original CHIRPS and (b) Kriging.

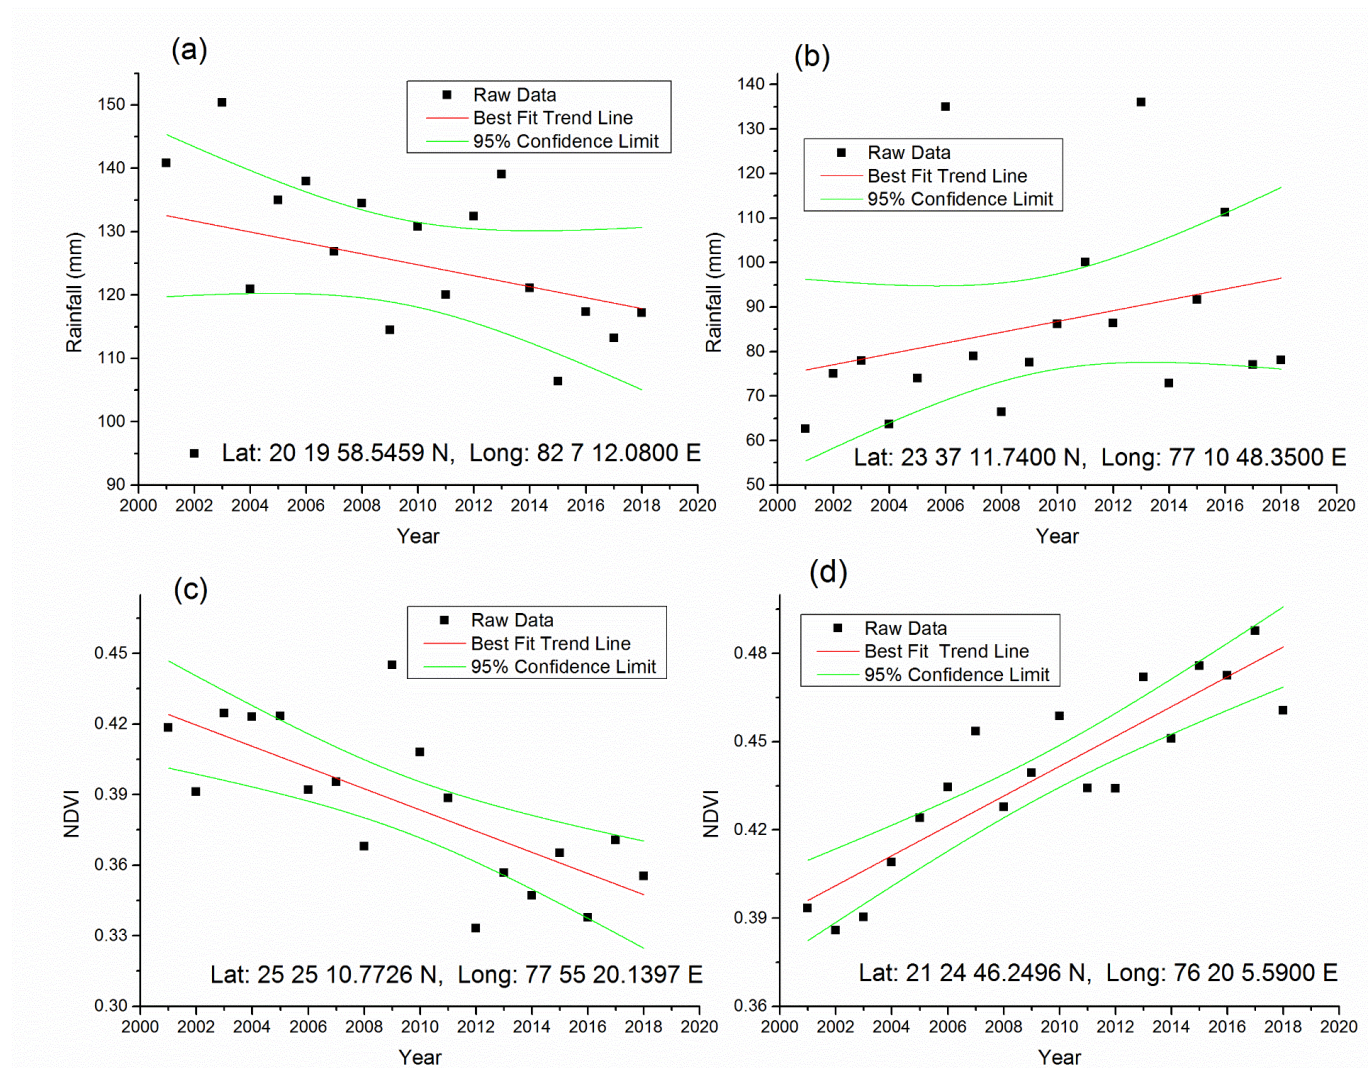

**Figure S2.** Validation of significant (a and c) decreasing trends and (b and d) increasing trends.

**Table S1.** Standardised Rainfall Anomaly (SRA) from 2001 to 2018.

| <b>Class / Year</b> | <b>2001</b>  | <b>2002</b>  | <b>2003</b>  | <b>2004</b>  | <b>2005</b>  | <b>2006</b>  | <b>2007</b>  | <b>2008</b>  | <b>2009</b>  | <b>2010</b>  | <b>2011</b>  | <b>2012</b>  | <b>2013</b>  | <b>2014</b>  | <b>2015</b>  | <b>2016</b>  | <b>2017</b>  | <b>2018</b>  |
|---------------------|--------------|--------------|--------------|--------------|--------------|--------------|--------------|--------------|--------------|--------------|--------------|--------------|--------------|--------------|--------------|--------------|--------------|--------------|
| <b>&lt;-2</b>       | 0.00         | 13.99        | 0.00         | 0.00         | 0.03         | 0.00         | 0.00         | 0.00         | 1.57         | 3.95         | 0.84         | 0.00         | 0.00         | 0.00         | 0.20         | 0.00         | 0.00         | 0.00         |
| <b>-2 - -1</b>      | 14.94        | 50.30        | 4.54         | 24.43        | 12.07        | 3.55         | 4.55         | 1.14         | 31.14        | 22.60        | 11.21        | 5.05         | 0.01         | 5.64         | 42.40        | 3.50         | 9.60         | 9.60         |
| <b>-1 - -0.5</b>    | 9.62         | 21.05        | 8.80         | 36.00        | 9.52         | 11.97        | 13.24        | 19.30        | 30.99        | 8.31         | 6.02         | 9.02         | 0.61         | 44.53        | 33.33        | 9.84         | 36.95        | 36.95        |
| <b>-0.5 - 0</b>     | 21.24        | 12.90        | 17.15        | 32.37        | 14.44        | 15.71        | 10.24        | 26.66        | 25.84        | 12.70        | 11.58        | 17.28        | 4.59         | 39.94        | 19.88        | 16.80        | 20.18        | 20.18        |
| <b>-0 - -0.5</b>    | 28.33        | 1.25         | 23.38        | 6.14         | 20.62        | 16.49        | 30.74        | 17.38        | 9.39         | 9.25         | 24.89        | 25.90        | 15.35        | 8.58         | 4.01         | 23.98        | 14.99        | 14.99        |
| <b>0.5 - 1</b>      | 17.14        | 0.52         | 23.23        | 1.06         | 17.45        | 20.47        | 21.92        | 18.87        | 1.06         | 10.22        | 31.33        | 25.77        | 18.29        | 1.31         | 0.18         | 14.76        | 9.60         | 9.60         |
| <b>1 - 2</b>        | 8.74         | 0.00         | 22.15        | 0.00         | 24.49        | 26.70        | 18.91        | 16.57        | 0.01         | 25.50        | 14.08        | 16.99        | 35.93        | 0.00         | 0.00         | 25.13        | 7.88         | 7.88         |
| <b>&gt;2</b>        | 0.00         | 0.00         | 0.76         | 0.00         | 1.37         | 5.11         | 0.39         | 0.07         | 0.00         | 7.46         | 0.05         | 0.00         | 25.23        | 0.00         | 0.00         | 5.99         | 0.79         | 0.79         |
| <b>Positive SRA</b> | <b>54.20</b> | <b>1.76</b>  | <b>69.52</b> | <b>7.19</b>  | <b>63.93</b> | <b>68.77</b> | <b>71.97</b> | <b>52.90</b> | <b>10.45</b> | <b>52.43</b> | <b>70.35</b> | <b>68.65</b> | <b>94.79</b> | <b>9.89</b>  | <b>4.20</b>  | <b>69.86</b> | <b>33.26</b> | <b>33.26</b> |
| <b>Negative SRA</b> | <b>45.80</b> | <b>98.24</b> | <b>30.48</b> | <b>92.81</b> | <b>36.07</b> | <b>31.23</b> | <b>28.03</b> | <b>47.10</b> | <b>89.55</b> | <b>47.57</b> | <b>29.65</b> | <b>31.35</b> | <b>5.21</b>  | <b>90.11</b> | <b>95.80</b> | <b>30.14</b> | <b>66.74</b> | <b>66.74</b> |

**Table S2.** Standardised NDVI Anomaly (SNA) during dry, normal and wet years.

| <b>NDVI</b>    | <b>2002</b> | <b>2011</b> | <b>2013</b> |
|----------------|-------------|-------------|-------------|
| <b>&lt;-3</b>  | 0.15        | 0.02        | 0.02        |
| <b>-3- -2</b>  | 5.25        | 0.19        | 0.07        |
| <b>-2 - -1</b> | 42.55       | 5.69        | 0.28        |
| <b>-1 - 0</b>  | 44.96       | 32.60       | 11.06       |
| <b>0 - 1</b>   | 6.86        | 53.10       | 38.86       |
| <b>1 - 2</b>   | 0.20        | 8.35        | 43.03       |
| <b>2 - 3</b>   | 0.03        | 0.05        | 6.68        |
| <b>&gt; 3</b>  | 0.00        | 0.00        | 0.00        |

**Table S3.** Area statistics (in %) of Sen's slope derived from different approaches using the Annual Mean NDVI.

|                |                   | Sen's Slope |        |        | Significant Area |        |       |
|----------------|-------------------|-------------|--------|--------|------------------|--------|-------|
| Sl.no          | Classified Range  | 250m_O      | 5km_AM | 5km_M  | 250m_O           | 5km_AM | 5km_M |
| Negative Trend | < -0.0172         | 0.03        | 0.02   | 0.03   | 0.03             | 0.01   | 0.02  |
|                | -0.0172 - -0.0055 | 0.28        | 0.05   | 0.34   | 0.26             | 0.01   | 0.16  |
|                | -0.0055 - -0.0008 | 5.13        | 0.78   | 4.67   | 0.82             | 0.05   | 0.43  |
|                | -0.0008 - 0       | 5.91        | 6.13   | 5.93   | 0.00             | 0.17   | 0.66  |
| Positive Trend | 0 - 0.0008        | 11.47       | 6.63   | 9.48   | 0.00             | 0.14   | 1.04  |
|                | 0.0008 - 0.0023   | 35.13       | 39.30  | 30.23  | 3.00             | 13.33  | 7.12  |
|                | 0.0023 - 0.0035   | 23.58       | 29.26  | 23.87  | 13.00            | 26.25  | 11.68 |
|                | 0.0035 - 0.0050   | 13.07       | 14.23  | 15.99  | 11.83            | 14.16  | 11.64 |
|                | 0.0050 - 0.0070   | 4.34        | 3.34   | 7.41   | 4.29             | 3.34   | 6.46  |
|                | > 0.0070          | 1.06        | 0.25   | 2.05   | 1.06             | 0.25   | 1.91  |
|                |                   | 100.00      | 100.00 | 100.00 | 34.30            | 57.71  | 41.12 |

**Note:** 250m MODIS Original data = O, 5km Aggregated Mean = AM and 5km MAJORITY = M

**Table S4.** Area statistics (in %) of Sen's slope derived from different approaches using Mean NDVI from the peak-growth period.

|                |                    | Sen's Slope |        |        | Significant Area |        |       |
|----------------|--------------------|-------------|--------|--------|------------------|--------|-------|
| Sl.no          | Classified Range   | 250m_O      | 5km_AM | 5km_M  | 250m_O           | 5km_AM | 5km_M |
| Negative Trend | <-0.0172           | 0.06        | 0.03   | 0.07   | 0.06             | 0.02   | 0.05  |
|                | -0.0172 - - 0.0055 | 0.50        | 0.11   | 0.61   | 0.37             | 0.10   | 0.07  |
|                | -0.0055 - - 0.0008 | 8.47        | 3.51   | 8.18   | 0.35             | 0.19   | 0.11  |
|                | -0.0008 - 0        | 9.00        | 7.45   | 8.30   | 0.15             | 0.14   | 0.31  |
| Positive Trend | 0 - 0.0008         | 10.59       | 7.36   | 8.75   | 0.00             | 0.00   | 0.48  |
|                | 0.0008 - 0.0023    | 26.58       | 30.34  | 21.93  | 0.61             | 6.76   | 1.93  |
|                | 0.0023 - 0.0035    | 19.41       | 26.06  | 18.11  | 4.10             | 19.97  | 2.96  |
|                | 0.0035 - 0.0050    | 14.80       | 17.74  | 17.18  | 8.12             | 16.62  | 4.72  |
|                | 0.0050 - 0.0070    | 7.64        | 6.30   | 10.81  | 6.20             | 6.08   | 4.99  |
|                | > 0.0070           | 2.95        | 1.11   | 6.06   | 2.80             | 1.10   | 4.01  |
|                |                    | 100.00      | 100.00 | 100.00 | 22.75            | 50.97  | 19.64 |

**Note:** 250m MODIS Original data = O, 5km Aggregated Mean = AM and 5km MAJORITY = M
